1                   **Environmental variation mediates the evolution of**  
2                                   **anticipatory parental effects**

3

4

5           Martin I. Lind <sup>1,\*</sup>, Martyna K. Zwoinska <sup>1</sup>, Johan Andersson <sup>1</sup>, Hanne Carlsson <sup>1,2</sup>,

6                            Therese Krieg <sup>1</sup>, Tuuli Larva <sup>1</sup> & Alexei A. Maklakov <sup>1,2</sup>

7

8

9

10   <sup>1</sup> Animal Ecology, Department of Ecology and Genetics, Uppsala University, 752 36  
11   Uppsala, Sweden

12

13   <sup>2</sup> School of Biological Sciences, University of East Anglia, Norwich Research Park,  
14   Norwich NR4 7TJ, UK

15   Martin I. Lind - [martin.i.lind@gmail.com](mailto:martin.i.lind@gmail.com)   \*Corresponding author

16

17

18   **Statement of authorship.** MIL and AAM designed the experiment, MIL, JA, HC,  
19   TK and TL performed experimental evolution, MIL, MKZ and JA performed  
20   phenotypic assays, MIL analysed the data. MIL drafted the manuscript together with  
21   AAM. All authors contributed to the revision of the manuscript.

22

23

24

25 **Abstract**

26 Environments vary over time and if this variation is predictable, environments that are  
27 similar across generations should favour evolution of anticipatory parental effects to  
28 benefit offspring. In contrast, the absence of correlation between parental and  
29 offspring environments should select against parental effects. However, experimental  
30 evidence is scarce. We investigated the evolution of maternal effects using  
31 experimental evolution. Populations of the nematode *Caenorhabditis remanei*,  
32 adapted to 20°C, were exposed to a novel temperature (25°C) for 30 generations with  
33 either positive or zero correlation between parent and offspring temperature. We  
34 found that populations evolving in environments with positive correlations had a  
35 positive maternal effect, since they required maternal exposure to 25°C to achieve  
36 maximum reproduction and fitness in 25°C. In contrast, populations evolving under  
37 zero correlation had lost this positive maternal effect. This shows that parental effects  
38 can aid population viability in warming environments. Correspondingly, ill-fitting  
39 parental effects can be rapidly lost.

40

41 Key words: *Caenorhabditis*, Environmental heterogeneity, Maternal effects,

42 Reproduction, Temperature, Transgenerational plasticity

43

## 44 **Introduction**

45 The role of environmental variation in the adaptive expression of phenotypes has  
46 gathered considerable interest (Chevin *et al.* 2010; Hollander *et al.* 2015; Donelson *et*  
47 *al.* 2017; Lind & Spagopoulou 2018). Not only is heterogeneity common, it is also  
48 predicted to change evolutionary outcomes. While stable environments generally  
49 should select for genetic specialisation, environmental heterogeneity can select for  
50 environmental input on this process. Variable environments is expected to select for  
51 phenotypic plasticity (if environmental cues are reliable) or bet-hedging (if the cues  
52 are not reliable) (Moran 1992; Simons 2011). However, a developing organism may  
53 not be able to acquire and/or interpret the environmental cues itself; therefore, the  
54 parental environment can also function as a developmental cue (Marshall & Uller  
55 2007; Leimar & McNamara 2015). Consequently, recent theory maintains that high  
56 environmental correlation between generations can select for adaptive parental effects  
57 and/or epigenetic inheritance of an environmentally induced phenotype (Lachmann &  
58 Jablonka 1996; Bonduriansky & Day 2009; Rivoire & Leibler 2014; Kuijper & Hoyle  
59 2015; Leimar & McNamara 2015; Uller *et al.* 2015; Proulx & Teotónio 2017),  
60 mechanisms collectively referred to as transgenerational plasticity (Donelson *et al.*  
61 2017). The sign of the environmental correlation is expected to result in a similar sign  
62 of the parental effect, so that parents can prepare their offspring for the same  
63 environment as they are themselves experiencing (positive correlation), the opposite  
64 environment (negative correlation) or does not influence the phenotype of their  
65 offspring (zero correlation between parent and offspring environments). The  
66 exception is constant (perfectly correlated) environments, where genetic specialisation  
67 is predicted to evolve (Leimar & McNamara 2015) together with a negative trans-

68 generational effect in order to reduce phenotypic variance (Hoyle & Ezard 2012;  
69 Kuijper & Hoyle 2015).  
70  
71 However, while the theory is well developed, the empirical evidence is mixed. In its  
72 most basic form, the theory of anticipatory parental effects predicts that offspring  
73 should have higher performance if parental and offspring environments are matching  
74 (Marshall & Uller 2007; Burgess & Marshall 2014). There are some striking  
75 examples of this (e.g. Gustafsson *et al.* 2005; Galloway & Etterson 2007; Jensen *et al.*  
76 2014; Kishimoto *et al.* 2017; Ryu *et al.* 2018; Toyota *et al.* 2019), but across studies  
77 there is only weak support for this prediction in natural systems, and the effects are  
78 small compared to the direct effects of offspring environment (reviewed in Uller *et al.*  
79 2013). Since environmental predictability across generations is seldom quantified, one  
80 reason for the scarcity of clear examples of adaptive parental effects is that  
81 environments may not often be correlated across generations, and, therefore, provide  
82 little opportunity for selection for such anticipatory effects (Burgess & Marshall  
83 2014). Even if natural environments are correlated, the evidence for stronger parental  
84 effects in more stable environments is mixed, and varies between traits (Walsh *et al.*  
85 2016). Thus, there is a call for studies estimating parent and offspring fitness when the  
86 environmental predictability between generations are well known, and maternal  
87 effects are expected to be under selection (Burgess & Marshall 2014).  
88  
89 Direct experimental evidence for the evolution of positive anticipatory parental effects  
90 of an environmentally induced parental phenotype is currently lacking. On the other  
91 hand, if parents and offspring live in negatively correlated environments, the parental  
92 phenotype should not be inherited, but the parents can still anticipate the offspring

93 environment. As such, the evolution of a negative parental effect could be adaptive, a  
94 prediction that has recently received experimental support in a study by Dey *et al.*  
95 (Dey *et al.* 2016), who found that populations of the nematode *Caenorhabditis*  
96 *elegans* that evolved under strictly alternating hypoxia-normoxia conditions in every  
97 generation evolved a negative maternal provisioning effect. This suggests an adaptive  
98 benefit of maternal effects when the maternal environment is a strong cue for the  
99 offspring environment (in this case a perfect negative correlation), as predicted by  
100 theory (Uller *et al.* 2015; Proulx & Teotónio 2017). More generally, theory also  
101 predicts that positive trans-generational correlations would result in the evolution of a  
102 positive parental effect and, importantly, if the environmental state is uncorrelated  
103 across generations, parental effects would be maladaptive and selected against  
104 (Lachmann & Jablonka 1996; Kuijper & Hoyle 2015; Leimar & McNamara 2015;  
105 Uller *et al.* 2015). The latter is considered a reason why adaptive parental effects are  
106 generally weak (Uller *et al.* 2013). However, these scenarios have not been  
107 investigated experimentally. Moreover, previous studies on evolution of parental  
108 effects under environmental heterogeneity have investigated only the case of non-  
109 overlapping generations (Dey *et al.* 2016). Most natural populations have however  
110 overlapping generations and age structure, which can influence evolution in both  
111 stable and heterogeneous environments, especially with respect to the evolution of life  
112 history strategies (Cotto & Ronce 2014).

113

114 Taken together, environmental heterogeneity and environmental correlations over  
115 generations predict the adaptive value of parental effects (Lachmann & Jablonka  
116 1996; Kuijper & Hoyle 2015; Uller *et al.* 2015). We set out to test this using  
117 experimental evolution in the dioecious free-living nematode *Caenorhabditis*

118 *remanei*, adapting to different temperature regimes. Genetically heterogeneous  
119 populations, previously adapted to 20°C, were evolving for 30 generations in control  
120 conditions or adapting to 25°C, in either constant 25°C, increased warming to 25°C or  
121 a heterogeneous environment with fluctuating temperatures. We found positive  
122 anticipatory maternal effects on reproduction in populations evolving in environments  
123 that were positively correlated across generations. Moreover, we found the evolution  
124 of a reduced maternal effect on reproduction in heterogeneous environments where  
125 parent and offspring environments were not correlated during experimental evolution.

126

## 127 **Material and methods**

128

### 129 *Experimental evolution*

130 As founder population, we used the wild-type SP8 strain of *C. remanei*, obtained from  
131 N. Timmermeyer at the Department of Biology, University of Tübingen, Germany.  
132 This strain was created by crossing three wild-type isolates of *C. remanei* (SB146,  
133 MY31, and PB206), harbour substantial standing genetic variation for life-history  
134 traits (Chen & Maklakov 2012; Lind *et al.* 2017), and has been lab-adapted to 20°C  
135 for 15 generations prior to setup of experimental evolution.

136 Experimental evolution was conducted for 30 generations in three climate cabinets;  
137 one set to 20°C, one to 25°C and one with a slowly increasing temperature (see  
138 below). Five selection regimes were used. *Control 20°C* was experiencing 20°C for  
139 30 generations, and *Warm 25°C* was experiencing 25°C for 30 generations. *Increased*  
140 *warming* started in 20°C, the cabinet temperature was then raised by 0.1°C every 2.13  
141 day (rounded to whole days) to reach 25°C the last day of selection. *Slow temperature*  
142 *cycles* spend their first 10 generations in 20°C, were then moved to the 25°C cabinet

143 for 10 generations, to finish the last 10 generations in the 20°C cabinet. Finally, the  
144 *Fast temperature cycles* regime were moved between 20°C and 25°C every second  
145 generation, thus experiencing 15 temperature shifts.

146 Generation time in 20°C and 25°C was defined as the average difference in age  
147 between parents and offspring (Charlesworth 1994) and was calculated from the life-  
148 table of age-specific reproduction and survival by solving the Euler-Lotka equation  
149 (Stearns 1992; Charlesworth 1994) with trial data from the SP8 lines, and was 4.0  
150 days in 20°C and 3.4 days in 25°C. This resulted 120 days of selection for *Control*  
151 *20°C*, 114 days for *Slow temperature cycles*, 110 days for *Increased warming* and  
152 *Fast temperature cycles* and 101 days for *Warm 25°C*. For the two temperature cycle  
153 treatments, the worms spent shorter chronological time in 25°C than in 20°C, because  
154 of the faster generation time in 25°C. This ensured equal exposure to the two  
155 temperatures over biological time.

156 Experimental evolution was conducted on 92 mm NGM-plates (Stiernagle 2006) and  
157 to combat infections the agar and bacterial LB also contained the antibiotics  
158 kanamycin and streptomycin, and the fungicide nystatin (Lionaki & Tavernarakis  
159 2013; Lind *et al.* 2016). The plates were seeded with 2mL of the antibiotic resistant *E.*  
160 *coli* strain OP50-1 (pUC4K) obtained from J. Ewbank at the Centre d'Immunologie  
161 de Marseille- Luminy, France. To keep worm populations age-structured in  
162 overlapping generations, the lines were always kept in experimental growth face by  
163 cutting out a bit of agar containing 150 individuals of mixed ages and transferring this  
164 to freshly seeded plates. Transfer was conducted when needed (every 1-2 day), always  
165 before food was finished. Six independent replicate populations of each selection  
166 treatment were set up, resulting in a total of 30 populations. All populations were

167 expanded for two generations and frozen after 30 generations.

168

169 *Phenotypic assays*

170 Before assays, worms were recover from freezing and grown 2 generations in  
171 common garden, each generation synchronized by bleaching, a standard procedure  
172 that kills all life-stages but eggs (Stiernagle 2006). The common garden temperature  
173 was 20°C or 25°C (see below).

174

175 Fitness assays were performed to test for local adaptation to the selective regime and  
176 the evolution of adaptive trans-generational effects. We therefore carried out three  
177 assays, by varying parental temperature (the 2 generations of common garden after  
178 defrosting the lines) and testing temperature for offspring. The *20°C - 20°C assay* had  
179 both common garden and testing in 20°C. This is the environment the *Control 20°C*  
180 lines have experienced. Likewise, in the *25°C - 25°C assay* both parents and testing  
181 worms experience 25°C, which is the selective environment for *Warm 25°C* and very  
182 close to the final environment for *Increased warming*. Finally, the *20°C - 25°C assay*  
183 have 20°C as parental temperature, while the testing worms have their whole  
184 development in 25°C. This assay represents strong temperature fluctuations between  
185 generations, which is the selective environments for the *Fast temperature cycle* lines,  
186 and by comparing this assay to the *25°C - 25°C assay* we can estimate the importance  
187 of trans-generational effects on fitness when adapting to a novel environment.

188

189 The assays were initiated by synchronised egg-laying in the testing temperature by 40  
190 females of each population. After 5h, females were killed by bleaching, and setup of



191 L4 larvae was initiated 39h later (in 25°C) or 50h later (in 20°C), due to temperature-  
192 specific development time. The setup consisted of 8 testing females per plate, together  
193 with the same number of background males from the SP8 line. Sex ratio was kept 1:1  
194 throughout the experiment by adjusting the number of males to match the number of  
195 females alive. Age-specific fecundity was measured by each day allowing the females  
196 3h of egg-laying on an empty plate, where after the females were returned to a new  
197 plate (together with the males) and the number of hatched offspring on the egg-laying  
198 plate were counted 2 days later. The exact time the females were added to and  
199 removed from each plate was noted, and the number of offspring was corrected by  
200 exact number of minutes available for egg laying, and the number of females alive.  
201 Thus, we did not collect individual level data on total reproduction, but daily  
202 snapshot, in order to increase the number of individuals assayed and improve the  
203 reproduction estimate of each population. Daily reproduction was collected until all  
204 reproduction had ceased. Four replicate plates of each population was set up, and for  
205 the 20°C - 20°C and 20°C - 25°C assays the replicates were evenly split between two  
206 climate cabinets per temperature. However, for logistical reasons, the 20°C - 25°C  
207 assay was reduced. We excluded the *Slow temperature cycle* treatment from this  
208 assay, and unfortunately we lost two *Warm 25°C* populations during common garden  
209 (due to overcrowding and subsequent starving, which is known to induce epigenetic  
210 effects (Rechavi *et al.* 2014) and therefore these populations were excluded), leaving  
211 us with 4 replicate population of this treatment. This resulted in 30 replicate  
212 populations and 960 female worms for the 20°C - 20°C and 20°C - 25°C assays, and  
213 23 replicate populations and 736 female worms for the 25°C - 25°C assay.  
214  
215

216 *Statistical analyses*

217 The age-specific reproduction data was analysed as rate-sensitive individual fitness  
218  $\lambda_{\text{ind}}$  (Brommer *et al.* 2002) as well as the total reproduction of each replicate plate,  
219 adjusted to the number of females present each day. Individual fitness encompasses  
220 the timing and number of offspring and is analogous to the intrinsic rate of population  
221 growth (Stearns 1992) and was calculated by solving the Euler-Lotka equation for  
222 each replicate plate. Individual fitness and total reproduction in 20°C was analysed in  
223 separate mixed effect models with election treatment as fixed effect and population  
224 and cabinet as random effects. Both response variables were log-transformed before  
225 analysis. In 25°C, individual fitness and total reproduction was analysed with  
226 selection treatment and parental temperature as crossed fixed effects, and replicate  
227 population as random effect. Since the 25°C - 25°C assay was conducted in only one  
228 cabinet, and moreover the *Slow temperature cycle* treatment was not run, the random  
229 effect of cabinet was excluded from the models, as was the *Slow temperature cycle*  
230 treatment.

231

232

233 **Results**

234

235 For individual fitness ( $\lambda_{\text{ind}}$ ) in 25°C, we found a significant selection regime  $\times$   
236 parental temperature interaction (Selection regime:  $\chi^2 = 1.302$ ,  $df = 3$ ,  $p = 0.729$ ;  
237 Parental temperature:  $\chi^2 = 0.114$ ,  $df = 1$ ,  $p = 0.736$ , Selection regime  $\times$  Parental  
238 temperature:  $\chi^2 = 15.562$ ,  $df = 3$ ,  $p = 0.001$ ). This interaction was caused by  
239 significantly opposite slope for *Fast temperature cycles* compared to *Increased*  
240 *warming* and *Warm 25°C*, with highest fitness in 25°C for *Fast temperature cycles*

241 when parents were grown in 20°C, while highest fitness in 25°C for *Increased*  
242 *warming* and *Warm 25°C* was achieved when their parents were also grown in 25°C  
243 (Figure 1A).

244

245 A significant selection regime × parental temperature interaction was also found for  
246 total reproduction in 25°C (Selection regime:  $\chi^2 = 0.995$ ,  $df = 3$ ,  $p = 0.802$ ; Parental  
247 temperature:  $\chi^2 = 41.373$ ,  $df = 1$ ,  $p < 0.001$ , Selection regime × Parental temperature:  
248  $\chi^2 = 10.747$ ,  $df = 3$ ,  $p = 0.013$ ), caused by a much weaker positive effect of parental  
249 exposure to 25°C for *Fast temperature cycles* than for the other selection regimes  
250 (Figure 1B). Finally, we found a fitness cost of adaptation, since all lines had reduced  
251 individual fitness ( $\lambda_{ind}$ ) in 20°C relative to the *Control 20°C* lines ( $\chi^2 = 19.799$ ,  $df = 4$ ,  
252  $p < 0.001$ , Figure 2). The cost was however not detected in total reproduction ( $\chi^2 =$   
253  $2.238$ ,  $df = 4$ ,  $p = 0.692$ , Supplementary figure 1).

254

255

## 256 **Discussion**

257

258 The degree of environmental variation can influence the expression of phenotypes  
259 (Moran 1992; Uller *et al.* 2015; Proulx & Teotónio 2017). In addition to genetic  
260 specialisation, the phenotype can match the environment either by phenotypic  
261 plasticity, where the offspring matches its development to the current environment, or  
262 by anticipatory parental effects, where the offspring non-genetically inherit the  
263 parents phenotype to match its environment, thus improving offspring performance if  
264 parent and offspring environments are matching (Marshall & Uller 2007; Donelson *et*  
265 *al.* 2017). While within-generation phenotypic plasticity is common (DeWitt &

266 Scheiner 2004), parental effects seem, in contrast, to be generally weak (Uller *et al.*  
267 2013), despite some well known examples (Gustafsson *et al.* 2005; Galloway &  
268 Etterson 2007; Jensen *et al.* 2014; Kishimoto *et al.* 2017; Ryu *et al.* 2018; Toyota *et*  
269 *al.* 2019). Since trans-generational effects should evolve only if there is a strong  
270 correlation between parent and offspring environments (Kuijper & Hoyle 2015;  
271 Leimar & McNamara 2015; Uller *et al.* 2015), it is possible that environments  
272 generally are not highly correlated between generations, thus explaining why such  
273 anticipatory effects are uncommon (Uller *et al.* 2013). However, the environmental  
274 predictability is seldom investigated in studies of parental effects (Burgess &  
275 Marshall 2014). Therefore, we investigated whether the degree of temporal  
276 environmental variation, as well as the correlation between parent and offspring  
277 environment, influenced the evolution of maternal effects.  
278  
279 We found that the presence of environmental variation mediated the evolution of  
280 maternal effects on reproduction and individual fitness ( $\lambda_{ind}$ ) in *C. remanei* nematode  
281 worms adapting to a novel and stressful warm temperature (25°C) for 30 generations  
282 (see predictions and findings summarized in Supplementary table 1). For all  
283 populations evolving in stable or slowly increasing temperature (*Control 20°C, Warm*  
284 *25°C, Increased warming*), a strong positive maternal effect on reproductive output  
285 resulted in an increased offspring production in 25°C when the parents were also  
286 cultured in 25°C and not in 20°C. Since these populations have evolved in  
287 environments with high and positive environmental correlations over generations,  
288 trans-generational effects are adaptive and predicted by theory (Mousseau & Fox  
289 1998; Kuijper & Hoyle 2015; Leimar & McNamara 2015; Uller *et al.* 2015). This  
290 result is also in agreement with a recent study by Dey *et al.* (2016) who found the

291 evolution of an anticipatory negative maternal effect in *C. elegans* evolving in  
292 perfectly negatively correlated environments. Our finding of positive anticipatory  
293 maternal effects in positively correlated environments highlights the importance of  
294 experimental evolution studies with known environmental correlations to study the  
295 evolution of adaptive trans-generational effects.

296

297 In contrast to environments with high positive correlations, the *Fast temperature*  
298 *cycles* populations evolved in a fluctuating environment where the temperature  
299 changed every second generation. Thus, the next generation would with equal  
300 likelihood be exposed to the same or a different temperature as the parents, resulting  
301 in zero correlation between parent and offspring environments. In this environment,  
302 trans-generational effects are not considered adaptive (Mousseau & Fox 1998; Uller  
303 *et al.* 2015), and, in agreement with the theory, we found a loss of the positive  
304 maternal effect, since the reproductive output in 25°C of these lines was independent  
305 of the environment their parents. The adaptive value of these differences in parental  
306 effects is illustrated in the individual fitness ( $\lambda_{\text{ind}}$ ) of the different selection treatments.  
307 *Fast temperature cycles* populations had highest  $\lambda_{\text{ind}}$  in 25°C only when the parents  
308 were cultured for two generations in 20°C, a situation mimicking the fluctuating  
309 environments they were exposed to during evolution. Although adaptive, this should  
310 be defined as negative maternal on  $\lambda_{\text{ind}}$ , which is not predicted by theory. Thus,  
311 maternal effects on reproduction and  $\lambda_{\text{ind}}$  does not follow the same pattern for the *Fast*  
312 *temperature cycles*, but importantly, none of the measures show the positive maternal  
313 effects present in lines from more positively correlated environments (figure 1). In  
314 contrast, populations adapting to more or less stable warm temperatures (*Warm 25°C*  
315 and *Increased warming*) improved  $\lambda_{\text{ind}}$  when parents were also cultured in 25°C,

316 which mimics stable temperatures over generations and a positive maternal effect on  
317  $\lambda_{\text{ind}}$ . Whether the negative maternal effect on fitness in the *Fast temperature cycles* is  
318 a result of the fact that the assays with parents and offspring in 25°C represent a  
319 stability not experienced evolutionarily by the *Fast temperature cycles* populations  
320 (two generations common garden for the parents and one generation offspring testing  
321 equals to three generations in the same environment), or is a general response when  
322 parent and offspring environment is not matching is unknown.

323

324 In addition, we also found a fitness cost of adaptation, since all populations evolving  
325 in new environments had lower  $\lambda_{\text{ind}}$  in the original environment (20°C), compared to  
326 the *Control 20°C* populations. Moreover, although *Control 20°C* showed a positive  
327 maternal effect on reproduction, parental exposure to 25°C did not improve their  
328 individual fitness, suggesting that an evolutionary history in 25°C is needed for  
329 maximum fitness in this temperature.

330

331 While the positive maternal effect present in both stable (*Control 20°C*, *Warm 25°C*)  
332 and slowly increasing (*Increased warming*) temperature regimes is anticipated when  
333 there is positive autocorrelation between parent and offspring environments  
334 (Lachmann & Jablonka 1996; Uller *et al.* 2015), perfectly stable environments are  
335 actually predicted to select for negative trans-generational effects (Hoyle & Ezard  
336 2012; Kuijper & Hoyle 2015). When a population is well adapted to a stable  
337 optimum, a negative maternal effect reduces phenotypic variance between  
338 generations. However, we find no support for this prediction, since both treatments in  
339 stable environments (*Control 20°C*, *Warm 25°C*) showed a positive maternal effect,  
340 even after 30 generations in stable conditions. It is however possible that these lines

341 still show transient dynamics, since a positive trans-generational effect is predicted to  
342 evolve as a transient response when experiencing a novel environment (Kuijper &  
343 Hoyle 2015), in a similar way to how phenotypic plasticity is predicted to aid  
344 adaptation to new environments (Price *et al.* 2003; Lande 2009; Chevin *et al.* 2010;  
345 Coulson *et al.* 2017). It could possibly be argued that the positive trans-generational  
346 effect is non-adaptive, caused by the lines being maladapted in 20°C and therefore  
347 producing low-quality offspring in this temperature. However, the fact that the  
348 *Control 20°C* lines, who have highest fitness in 20°C and who have not experienced  
349 25°C for at least 45 generations show positive maternal effects on reproduction of  
350 parental exposure to 25°C argues against a non-adaptive explanation and instead  
351 reinforces the view that all lines from stable and slowly changing environment has an  
352 adaptive positive maternal effect. In agreement with this, exposing a laboratory strain  
353 of *C. elegans* to 25°C (Schott *et al.* 2014) or to starvation (Rechavi *et al.* 2014)  
354 results in heritable changes in gene expression, directed by inherited small RNA  
355 (Rechavi *et al.* 2014; Schott *et al.* 2014; Hourri-Zeevi & Rechavi 2017), which further  
356 suggests that transgenerational plasticity such as maternal effects and epigenetic  
357 inheritance is important in *Caenorhabditis* nematodes.

358

359 We found that the environmental correlation between generations is driving the  
360 evolution of anticipatory maternal effects, and the experimental design assured low  
361 within-generation heterogeneity. While stable and slowly changing environments  
362 select for positive anticipatory maternal effects, environments that fluctuate with no  
363 correlation between generations select against parental influence on offspring  
364 phenotype. This is the first empirical study that investigates the evolutionary loss of  
365 anticipatory maternal effect, which follow theoretical predictions (Kuijper & Hoyle

366 2015; Uller *et al.* 2015) and suggest that one reason for the weak effects of parent  
367 environment on offspring phenotype in natural systems (Uller *et al.* 2013) could be  
368 that natural environments are not always temporally correlated across generations.  
369 While most examples of positive parental effects comes from systems with short life-  
370 cycles such as nematodes (Kishimoto *et al.* 2017), daphniids (Gustafsson *et al.* 2005;  
371 Toyota *et al.* 2019), annelids (Jensen *et al.* 2014) and herbs (Galloway & Etterson  
372 2007), it is also been found in fish where the generation time span years (Ryu *et al.*  
373 2018). However, when investigating maternal effects in *Daphnia* from natural  
374 populations with different degree of variation in predation intensity, Walsh *et al.*  
375 (2016) found some support for stronger positive maternal effects in population from  
376 more stable environments, but the effect differed between traits and no effect was  
377 found on reproduction. Nevertheless, these types of studies where the environmental  
378 predictability is known are vital for our understanding of the selection pressures  
379 resulting in the presence or absence of adaptive maternal effects in natural populations  
380 (Burgess & Marshall 2014), where deconstruction of environmental predictability to  
381 seasonality and environmental colour noise (following Marshall & Burgess 2015) is a  
382 very promising approach.

383

384 On-going climate change is not only resulting in warmer temperatures, but also  
385 increased temperature variation, which can impact both the ecology and evolution of  
386 populations and species (Vasseur *et al.* 2014; Vázquez *et al.* 2017), and trans-  
387 generational acclimation can be an important response to deal with a warming climate  
388 (Donelson *et al.* 2017; Ryu *et al.* 2018). We show that environmental heterogeneity  
389 drives the evolution of maternal effects, and support the theoretical predictions  
390 (Lachmann & Jablonka 1996; Uller *et al.* 2015) that the correlation between parent



391 and offspring environment is the driver of the evolution of transgenerational  
392 plasticity.

393

### 394 **Acknowledgement**

395 This work was funded by the Swedish Research Council [grant number 2016-05195  
396 to MIL, grant number 621-2013-4828 to AAM] and the European Research Council  
397 [grants AGINGSEXDIFF and GERMLINEAGEINGSOMA to AAM]. We thank  
398 Frank Johansson, Anssi Laurila, Irja Ida Ratikainen and Claus R uffler for discussions.

399

### 400 **Competing interests**

401 The authors report no competing interests.

402

### 403 **Materials & Correspondence**

404 Requests for material and correspondence should be addressed to MIL.

405

### 406 **References**

407 Bonduriansky, R. & Day, T. (2009). Nongenetic inheritance and its evolutionary  
408 implications. *Annu. Rev. Ecol. Evol. Syst.*, 40, 103–125.

409 Brommer, J.E., Meril , J. & Kokko, H. (2002). Reproductive timing and individual  
410 fitness. *Ecol. Lett.*, 5, 802–810.

411 Burgess, S.C. & Marshall, D.J. (2014). Adaptive parental effects: the importance of  
412 estimating environmental predictability and offspring fitness appropriately.

413 *Oikos*, 123, 769–776.

414 Charlesworth, B. (1994). *Evolution in age-structured populations*. 2nd edn.

415 Cambridge University Press, New York, NY, USA.

- 416 Chen, H. & Maklakov, A.A. (2012). Longer life span evolves under high rates of  
417 condition-dependent mortality. *Curr. Biol.*, 22, 2140–2143.
- 418 Chevin, L.-M., Lande, R. & Mace, G.M. (2010). Adaptation, plasticity, and extinction  
419 in a changing environment: towards a predictive theory. *PLoS Biol*, 8,  
420 e1000357.
- 421 Cotto, O. & Ronce, O. (2014). Maladaptation as a source of senescence in habitats  
422 variable in space and time. *Evolution*, 68, 2481–2493.
- 423 Coulson, T., Kendall, B.E., Barthold, J., Plard, F., Schindler, S., Ozgul, A., *et al.*  
424 (2017). Modeling adaptive and nonadaptive responses of populations to  
425 environmental change. *Am. Nat.*, 190, 313–336.
- 426 DeWitt, T.J. & Scheiner, S.M. (2004). *Phenotypic plasticity: functional and*  
427 *conceptual approaches*. Oxford University Press, New York, NY, USA.
- 428 Dey, S., Proulx, S.R. & Teotónio, H. (2016). Adaptation to temporally fluctuating  
429 environments by the evolution of maternal effects. *PLoS Biol.*, 14, e1002388.
- 430 Donelson, J.M., Salinas, S., Munday, P.L. & Shama, L.N.S. (2017). Transgenerational  
431 plasticity and climate change experiments: Where do we go from here? *Glob.*  
432 *Change Biol.*, 24, 13–34.
- 433 Galloway, L.F. & Etterson, J.R. (2007). Transgenerational plasticity is adaptive in the  
434 wild. *Science*, 318, 1134–1136.
- 435 Gustafsson, S., Rengefors, K. & Hansson, L.-A. (2005). Increased consumer fitness  
436 following transfer of toxin tolerance to offspring via maternal effects. *Ecology*,  
437 86, 2561–2567.
- 438 Hollander, J., Snell-Rood, E. & Foster, S. (2015). New frontiers in phenotypic  
439 plasticity and evolution. *Heredity*, 115, 273–275.

- 440 Houri-Zeevi, L. & Rechavi, O. (2017). A matter of time: small RNAs regulate the  
441 duration of epigenetic inheritance. *Trends Genet.*, 33, 46–57.
- 442 Hoyle, R.B. & Ezard, T.H.G. (2012). The benefits of maternal effects in novel and in  
443 stable environments. *J. R. Soc. Interface*, 9, 2403–2413.
- 444 Jensen, N., Allen, R.M. & Marshall, D.J. (2014). Adaptive maternal and paternal  
445 effects: gamete plasticity in response to parental stress. *Funct. Ecol.*, 28, 724–  
446 733.
- 447 Kishimoto, S., Uno, M., Okabe, E., Nono, M. & Nishida, E. (2017). Environmental  
448 stresses induce transgenerationally inheritable survival advantages via  
449 germline-to-soma communication in *Caenorhabditis elegans*. *Nat. Commun.*,  
450 8, 14031.
- 451 Kuijper, B. & Hoyle, R.B. (2015). When to rely on maternal effects and when on  
452 phenotypic plasticity? *Evolution*, 69, 950–968.
- 453 Lachmann, M. & Jablonka, E. (1996). The inheritance of phenotypes: an adaptation to  
454 fluctuating environments. *J. Theor. Biol.*, 181, 1–9.
- 455 Lande, R. (2009). Adaptation to an extraordinary environment by evolution of  
456 phenotypic plasticity and genetic assimilation. *J. Evol. Biol.*, 22, 1435–1446.
- 457 Leimar, O. & McNamara, J.M. (2015). The evolution of transgenerational integration  
458 of information in heterogeneous environments. *Am. Nat.*, 185, E55–E69.
- 459 Lind, M.I., Chen, H., Meurling, S., Guevara Gil, A.C., Carlsson, H., Zwoinska, M.K.,  
460 *et al.* (2017). Slow development as an evolutionary cost of long life. *Funct.*  
461 *Ecol.*, 31, 1252–1261.
- 462 Lind, M.I. & Spagopoulou, F. (2018). Evolutionary consequences of epigenetic  
463 inheritance. *Heredity*, 121, 205–209.

- 464 Lind, M.I., Zwoinska, M.K., Meurling, S., Carlsson, H. & Maklakov, A.A. (2016).  
465 Sex-specific trade-offs with growth and fitness following lifespan extension  
466 by rapamycin in an outcrossing nematode, *Caenorhabditis remanei*. *J.*  
467 *Gerontol. A. Biol. Sci. Med. Sci.*, 71, 882–890.
- 468 Lionaki, E. & Tavernarakis, N. (2013). Assessing aging and senescent decline in  
469 *Caenorhabditis elegans*: cohort survival analysis. In: *Cell Senescence,*  
470 *Methods in Molecular Biology* (eds. Galluzzi, L., Vitale, I., Kepp, O. &  
471 Kroemer, G.). Humana Press, New York, pp. 473–484.
- 472 Marshall, D.J. & Burgess, S.C. (2015). Deconstructing environmental predictability:  
473 seasonality, environmental colour and the biogeography of marine life  
474 histories. *Ecol. Lett.*, 18, 174–181.
- 475 Marshall, D.J. & Uller, T. (2007). When is a maternal effect adaptive. *Oikos*, 116,  
476 1957–1963.
- 477 Moran, N.A. (1992). The evolutionary maintenance of alternative phenotypes. *Am.*  
478 *Nat.*, 139, 971–989.
- 479 Mousseau, T.A. & Fox, C.W. (1998). The adaptive significance of maternal effects.  
480 *Trends Ecol. Evol.*, 13, 403–407.
- 481 Price, T.D., Qvarnström, A. & Irwin, D.E. (2003). The role of phenotypic plasticity in  
482 driving genetic evolution. *Proc. R. Soc. Lond. Ser. B-Biol. Sci.*, 270, 1433–  
483 1440.
- 484 Proulx, S.R. & Teotónio, H. (2017). What kind of maternal effects can be selected for  
485 in fluctuating environments? *Am. Nat.*, 189, E118–E137.
- 486 Rechavi, O., Houriz-Ze'evi, L., Anava, S., Goh, W.S.S., Kerk, S.Y., Hannon, G.J., *et*  
487 *al.* (2014). Starvation-induced transgenerational inheritance of small RNAs in  
488 *C. elegans*. *Cell*, 158, 277–287.

- 489 Rivoire, O. & Leibler, S. (2014). A model for the generation and transmission of  
490 variations in evolution. *Proc. Natl. Acad. Sci.*, 111, E1940–E1949.
- 491 Ryu, T., Veilleux, H.D., Donelson, J.M., Munday, P.L. & Ravasi, T. (2018). The  
492 epigenetic landscape of transgenerational acclimation to ocean warming. *Nat.*  
493 *Clim. Change*, 8, 504–509.
- 494 Schott, D., Yanai, I. & Hunter, C.P. (2014). Natural RNA interference directs a  
495 heritable response to the environment. *Sci. Rep.*, 4, 7387.
- 496 Simons, A.M. (2011). Modes of response to environmental change and the elusive  
497 empirical evidence for bet hedging. *Proc. R. Soc. Lond. B Biol. Sci.*, 278,  
498 1601–1609.
- 499 Stearns, S.C. (1992). *The evolution of life histories*. Oxford University Press, New  
500 York, NY, USA.
- 501 Stiernagle, T. (2006). Maintenance of *C. elegans*. *WormBook Online Rev. C Elegans*  
502 *Biol.*
- 503 Toyota, K., Cuenca, M.C., Dhandapani, V., Suppa, A., Rossi, V., Colbourne, J.K., *et*  
504 *al.* (2019). Transgenerational response to early spring warming in *Daphnia*.  
505 *Sci. Rep.*, 9, 4449.
- 506 Uller, T., English, S. & Pen, I. (2015). When is incomplete epigenetic resetting in  
507 germ cells favoured by natural selection? *Proc R Soc B*, 282, 20150682.
- 508 Uller, T., Nakagawa, S. & English, S. (2013). Weak evidence for anticipatory parental  
509 effects in plants and animals. *J. Evol. Biol.*, 26, 2161–2170.
- 510 Vasseur, D.A., DeLong, J.P., Gilbert, B., Greig, H.S., Harley, C.D.G., McCann, K.S.,  
511 *et al.* (2014). Increased temperature variation poses a greater risk to species  
512 than climate warming. *Proc. R. Soc. B Biol. Sci.*, 281, 20132612.

513 Vázquez, D.P., Gianoli, E., Morris, W.F. & Bozinovic, F. (2017). Ecological and  
514 evolutionary impacts of changing climatic variability. *Biol. Rev.*, 92, 22–42.  
515 Walsh, M.R., Castoe, T., Holmes, J., Packer, M., Biles, K., Walsh, M., *et al.* (2016).  
516 Local adaptation in transgenerational responses to predators. *Proc R Soc B*,  
517 283, 20152271.  
518  
519

520

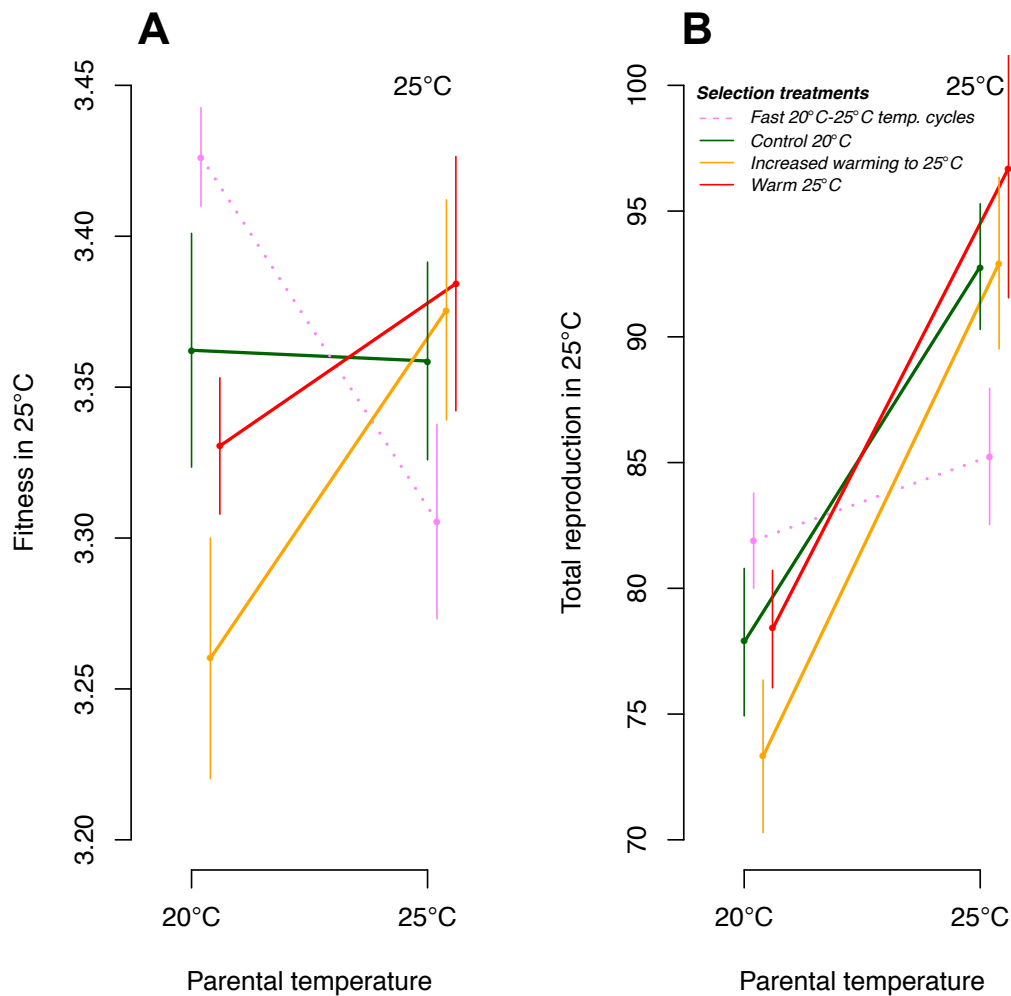

521

522 **Figure 1. The effect of parental temperature on fitness and reproduction in 25°C.**

523 Individual fitness  $\lambda_{\text{ind}}$  (A) and total reproduction (B) in 25°C when parent were raised

524 for 2 generations in either 20°C or 25°C. Symbols represent selection treatments

525 (mean  $\pm$  SE). *Control 20°C* and *Warm 25°C* have spent 30 generations in 20°C or

526 25°C, respectively. *Increased warming* has been subjected to slowly increased

527 temperatures, starting in 20°C and reaching 25°C at generation 30. *Fast temperature*

528 cycles have spent two generations in 20°C, followed by two generations in 25°C, this

529 cycle has then been repeated for 30 generations.

530

531

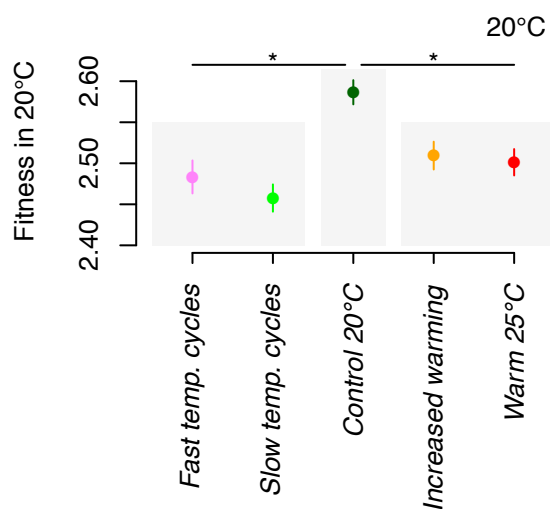

532

533 **Figure 2. Fitness in original environment.** Individual fitness  $\lambda_{\text{ind}}$  in 20°C when  
534 parents are also grown for two generations in 20°C. Symbols represent selection  
535 treatments (mean  $\pm$  SE). Grey symbolises treatments groups that differ significantly in  
536 fitness.

537
